# Supplementary material for: Community and single cell analyses reveal complex predatory interactions between bacteria in high diversity systems
Source: PubMed Central journal article supplement (PMC8446003; doi:10.1038/s41467-021-25824-9), 2021-09-16
Supplement: 41467_2021_25824_MOESM1_ESM.pdf [file 41467_2021_25824_MOESM1_ESM.pdf]

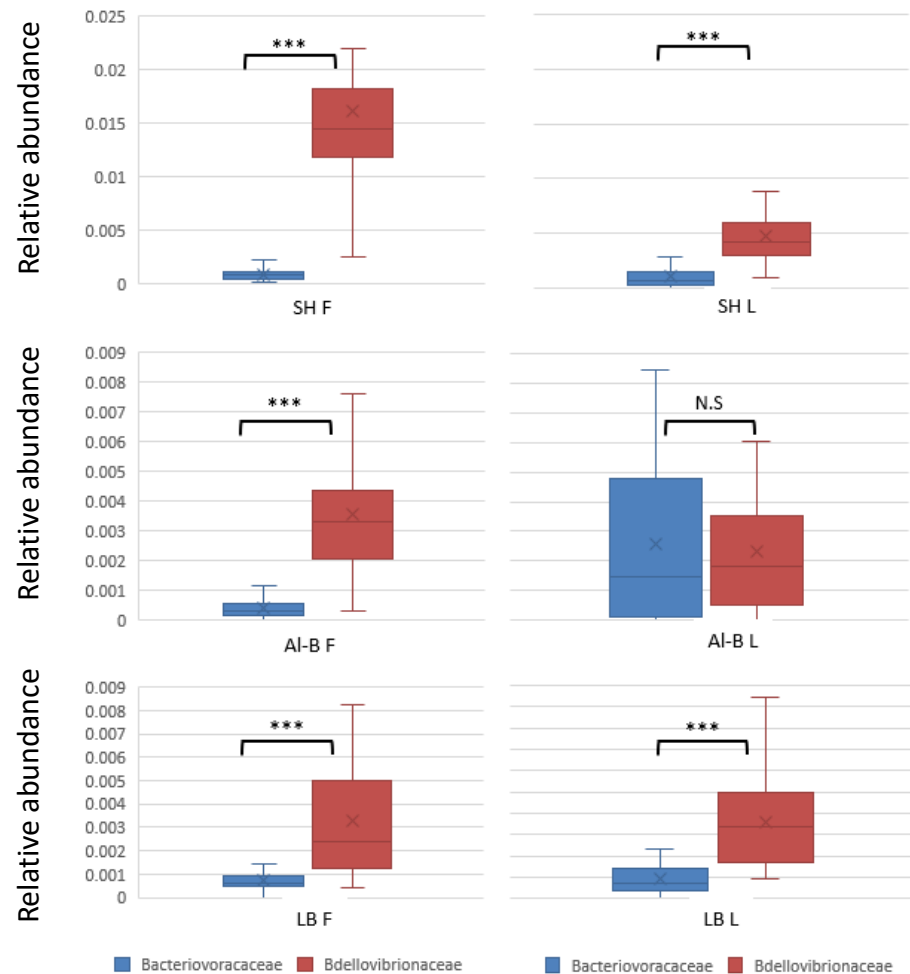

**Figure S1. Relative abundance of BALOs.** Box plot of the relative abundance in the total population of Bdellovibrionaceae (Bdellovibrionales) and Bacteriovoraceae (Bacteriovoracales) 16S rRNA gene sequences from the floc (F) and liquor (L) fractions at the Shafdan (SH) and Al-Bireh (AI) and Langenreichenbach (LB) WWTPs, in a year long time series including 18 sampling times and a total of 198 samples. The analysis was based on a general bacterial 16S rRNA gene sequencing data of , and was performed at the family level. Box limits indicate the 25th and 75th percentiles. Whiskers show the standard deviation of the abundance distribution. Two-tailed t-test statistics on abundance distributions in Bdellovibrionaceae and Bacteriovoraceae \*\*\* -  $p$ -value $<10^{-6}$ , no adjustment for multiple comparisons.

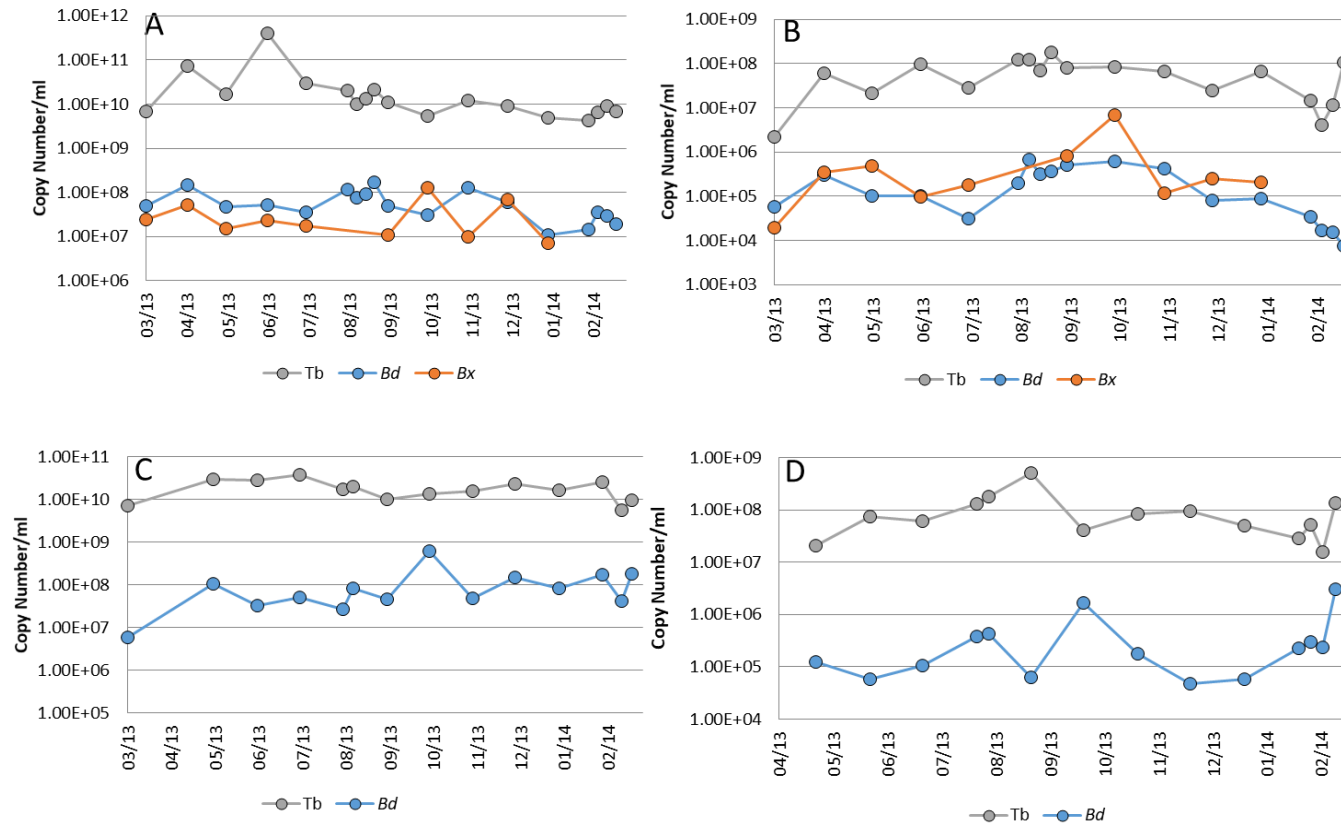

**Figure S2. Quantitative PCR (QPCR) of BALO and general bacterial populations.** QPCR-based analysis of the 16S rRNA gene dynamics of total bacteria (Tb, grey), Bdellovibrionales (Bd, blue) and Bacteriovorales (Bx, ocher), in floc (A, C) and liquor (B, D) samples from the Shafdan (A, B), and Al-Bireh (C, D) WWTPs. Bd and Bx were measured at the Shafdan; only Bd was measured at Al-Bireh.

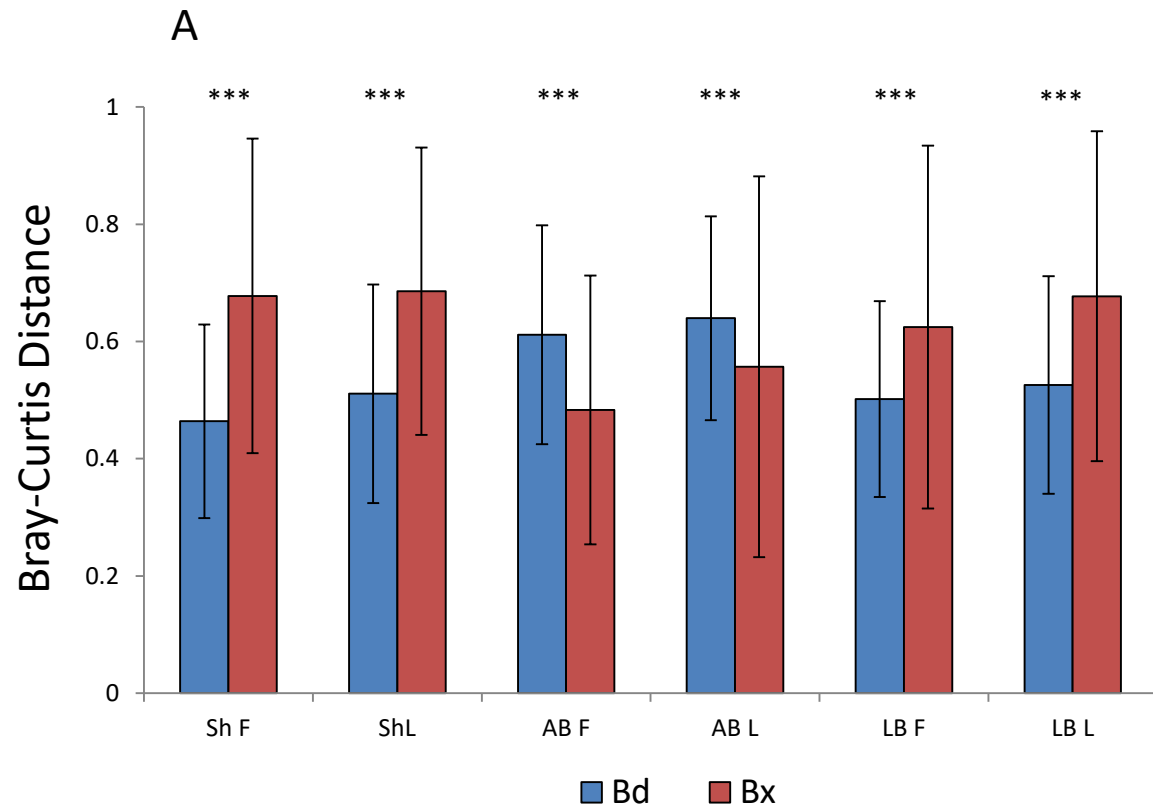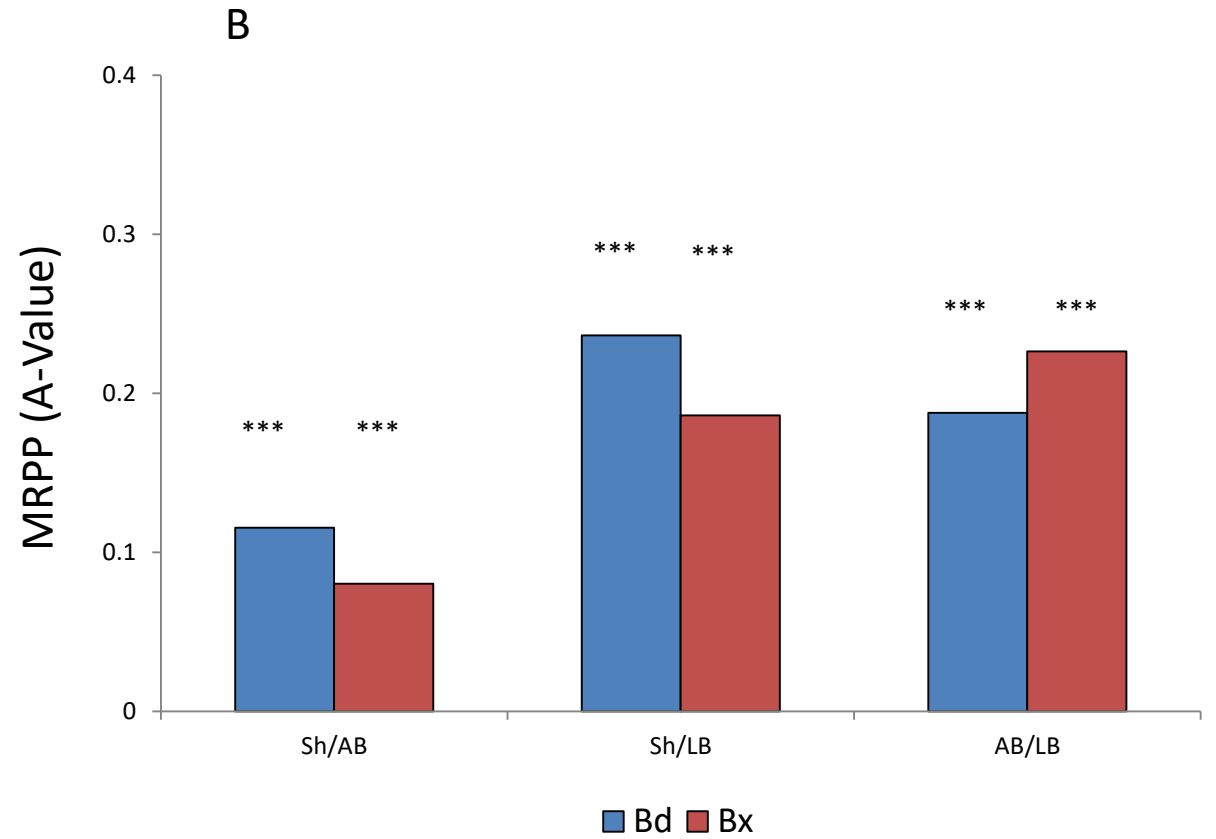

**Figure S3. Distance-based analyses of BALO communities.** A. Bray-Curtis distances of Bdellovibrionales (Bd) and Bacteriovoracales (Bx) communities within the WWTPs floc and liquor fractions. B. Dissimilarity values between the WWTPs for each community based on MRPP's A-value. Shafdan (SH), Al-Bireh (AB) and Langenreichenbach (LB). \*\*\* p-Value < 0.001. n=198 biological samples. P-values are based on two tailed Student's t-test, \*\*\* p-Value < 0.001. Error bars show standard deviation, no adjustment for multiple comparisons.

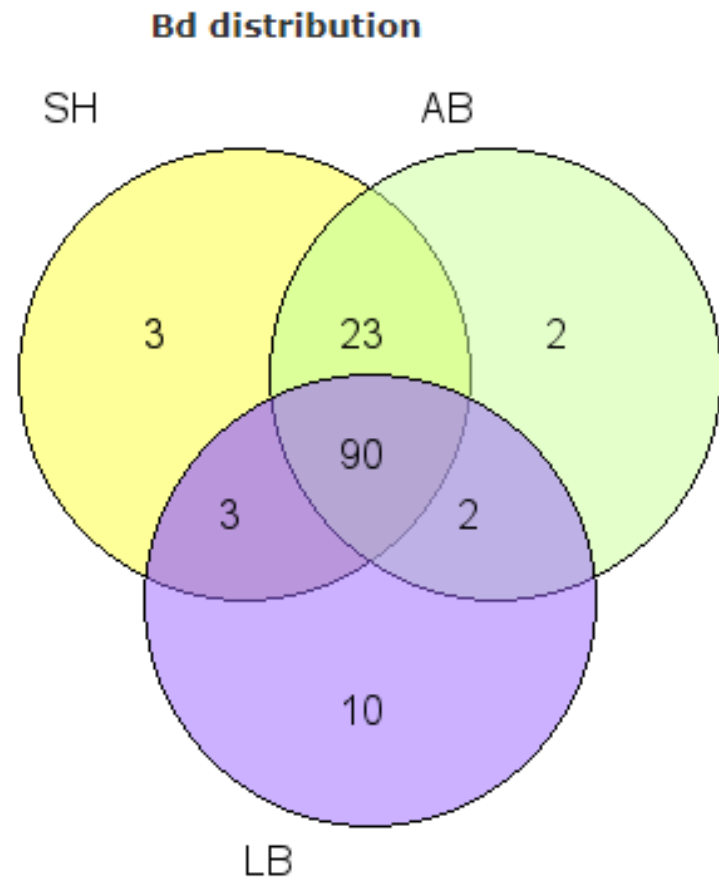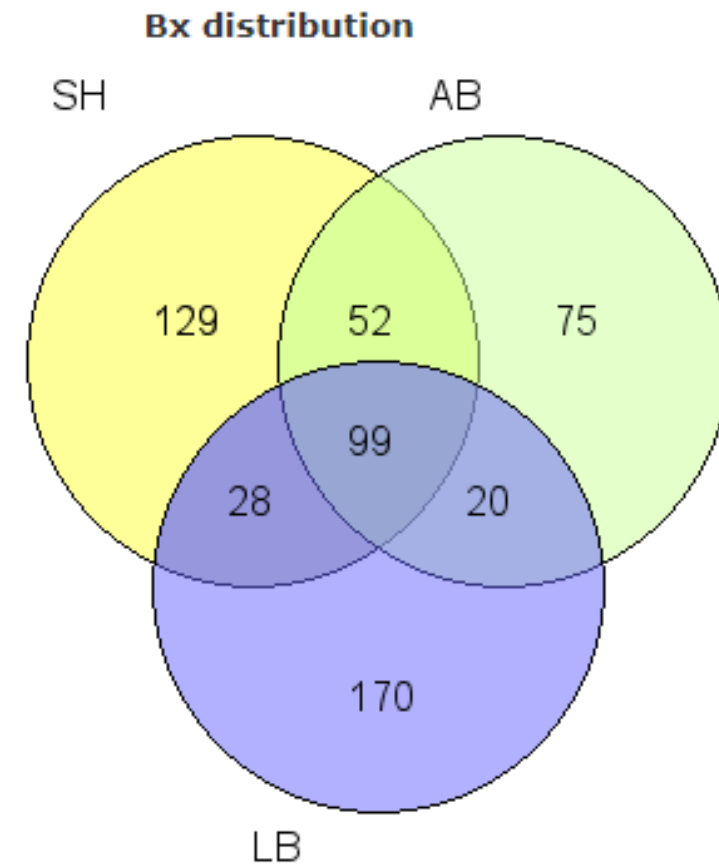

**Figure S4. BALO distributions between the WWTPs.** Common and shared Bdellovibrionales (Bd) and Bacteriovoracales (Bx) OTUs between the Shafdan (SH), Al-Bireh (AB) and Langenreichenbach (LB) WWTPs.

### Bdellovibrionales

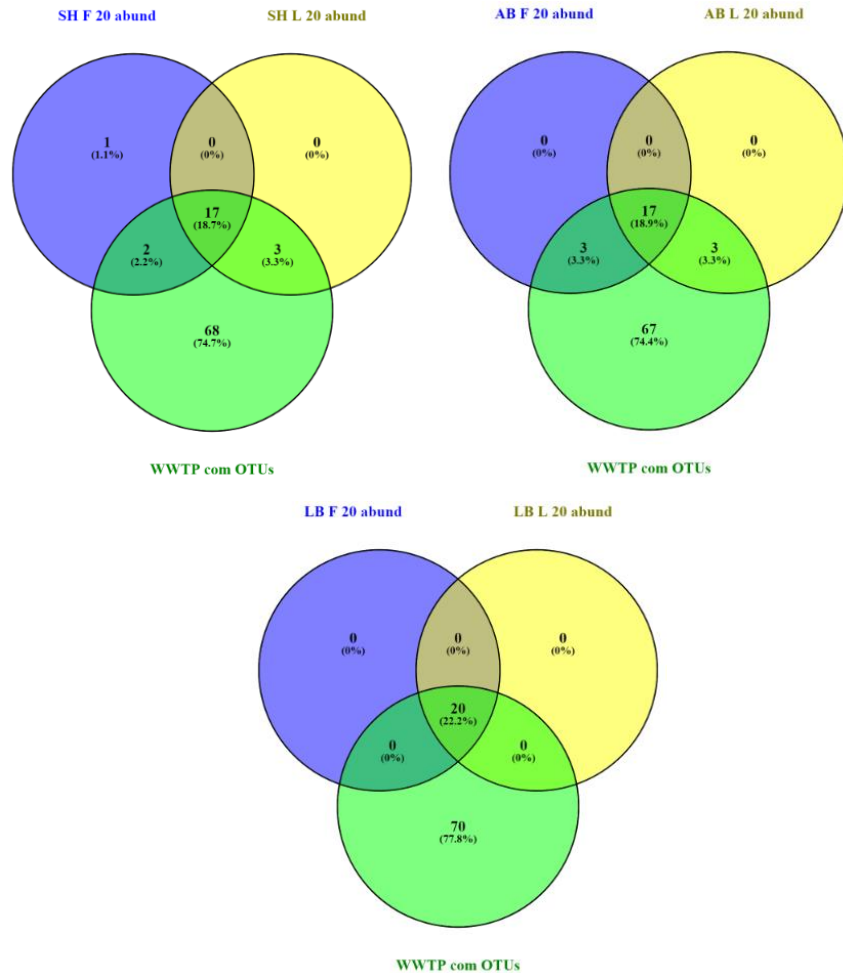

### Bacteriovorales

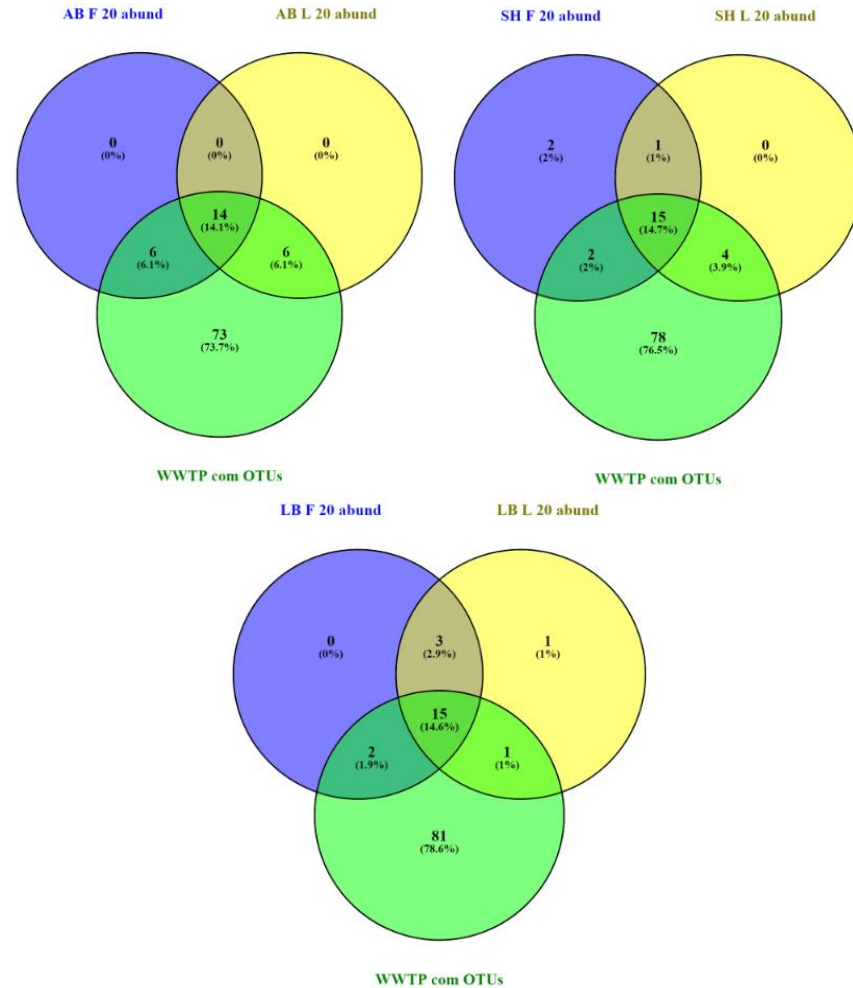

**Figure S5. Distribution of most abundant BALOs.** Overlap between the 20 most abundant Bdellovibrionales and Bacteriovorales floc and liquor OTUs at the Shafdan (SH), Al-Bireh (AB) and Langenreichenbach (LB) WWTPs, and the OTUs common to all three WWTPs, in each clade.

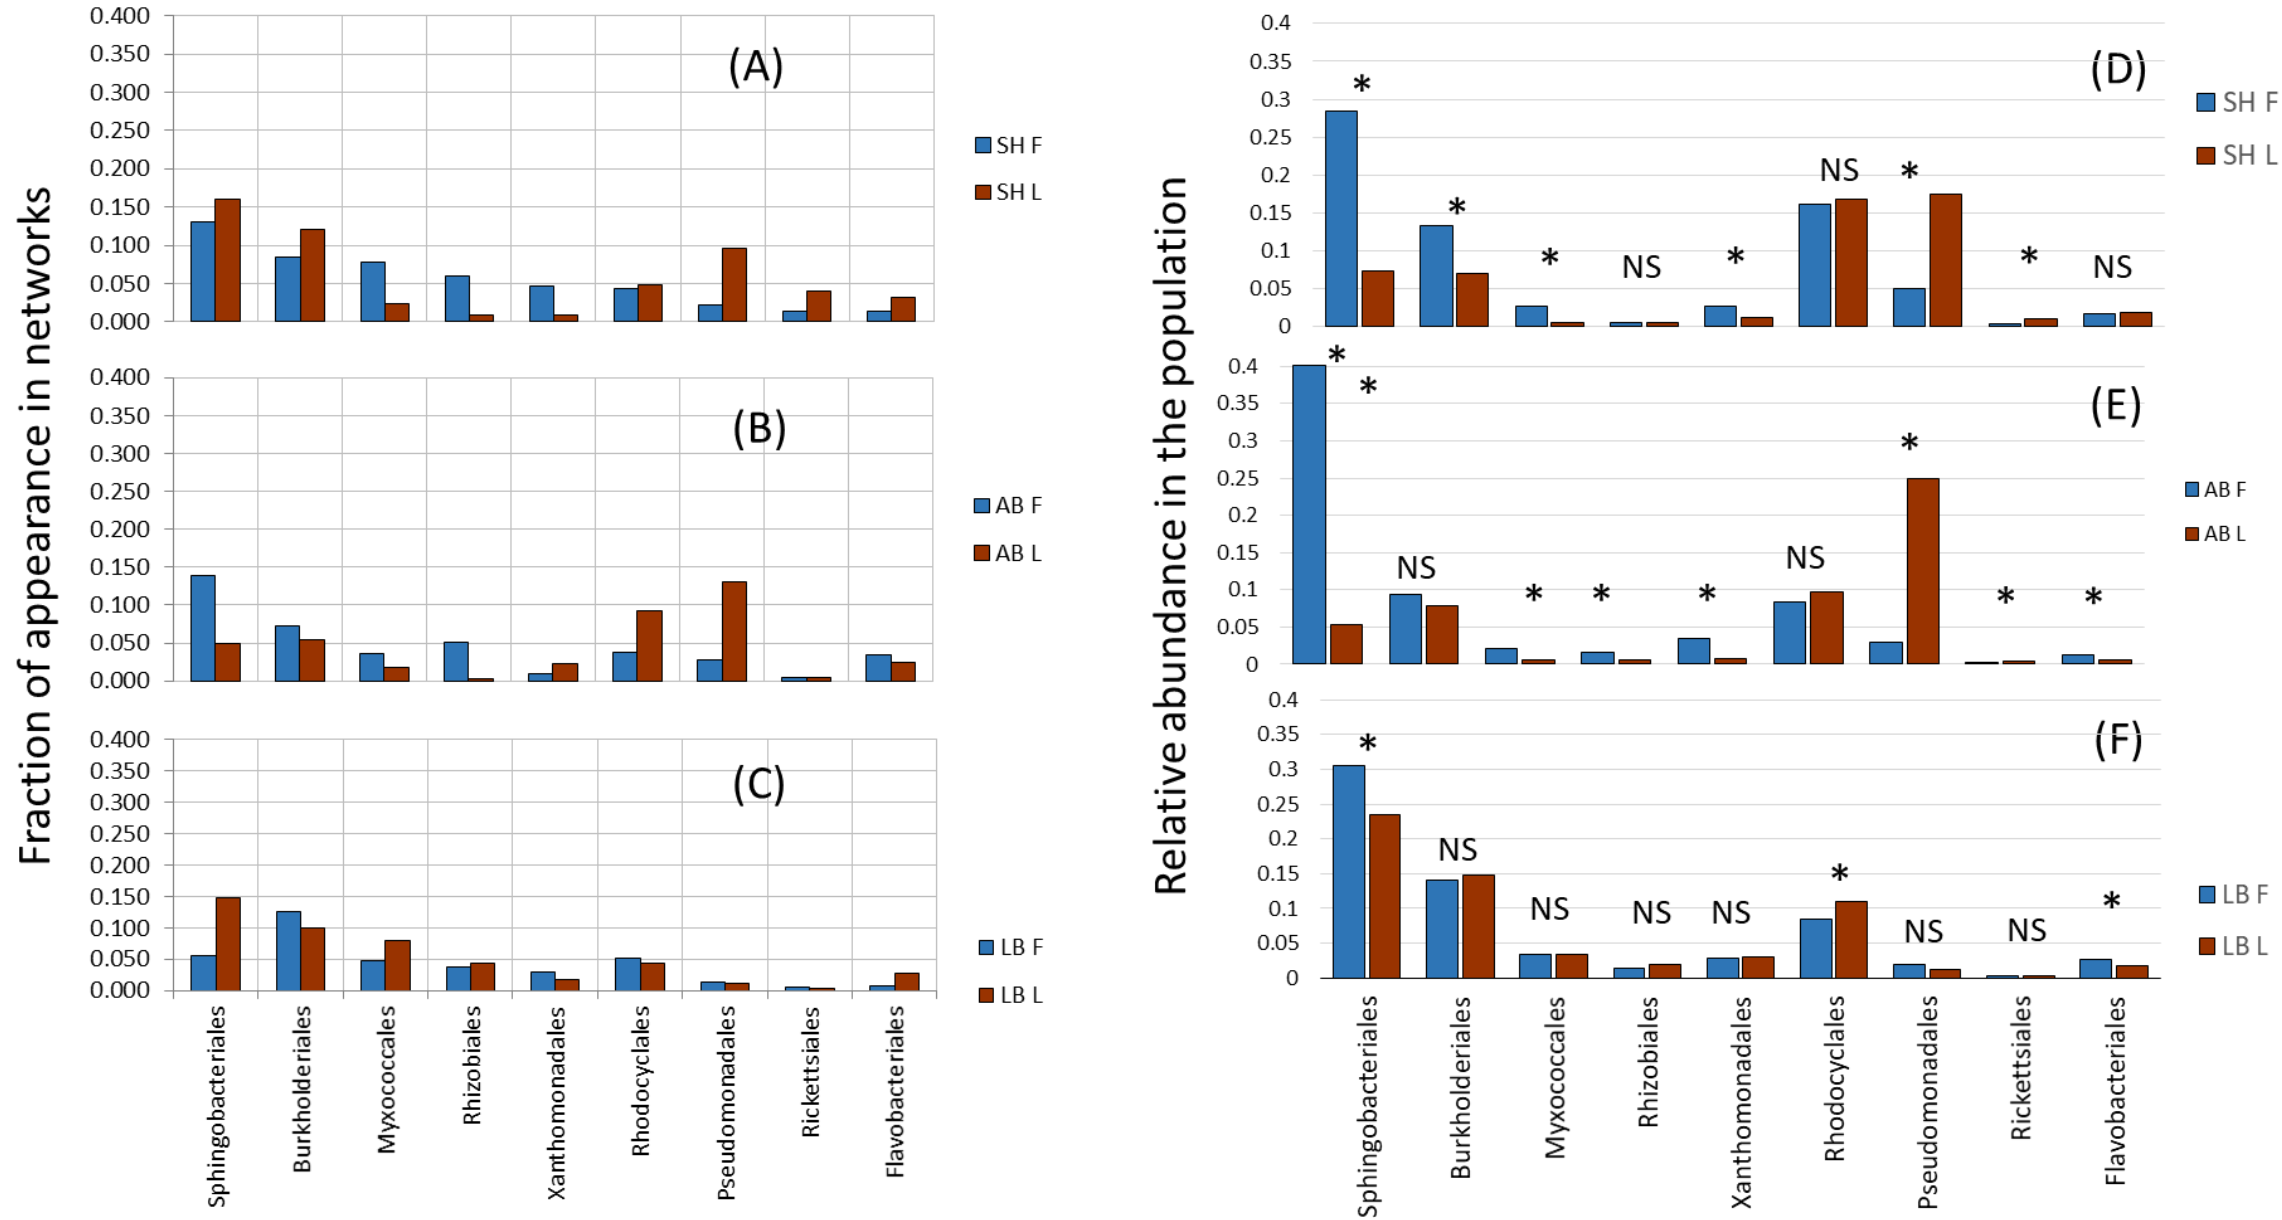

**Figure S6. Most abundant prey OTUs.** Fraction of the most abundant prey OTUs appearing in networks in the different WWTPs (A, B, C) and their relative abundance in the bacterial community (D, E, F), at each site and in each fraction. Shafdan (SH), Al-Bireh (AB), Langenreichenbach (LB); Flocs (F), liquor (L). Taxa are at the order level. t-test statistics on abundance distributions between flocs and liquor,  $p < 0.05$ , NS –not significant, no adjustment for multiple comparisons).

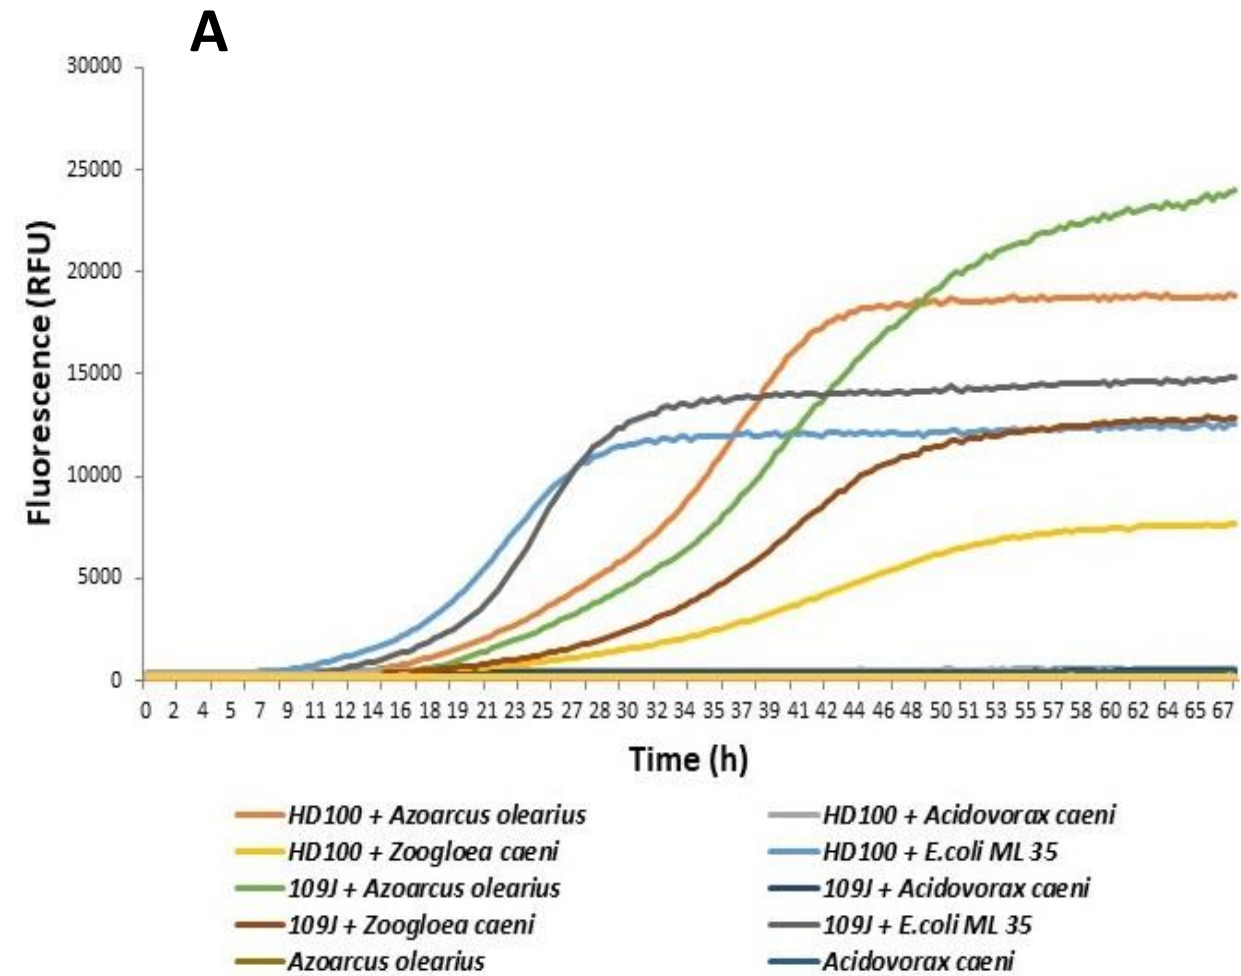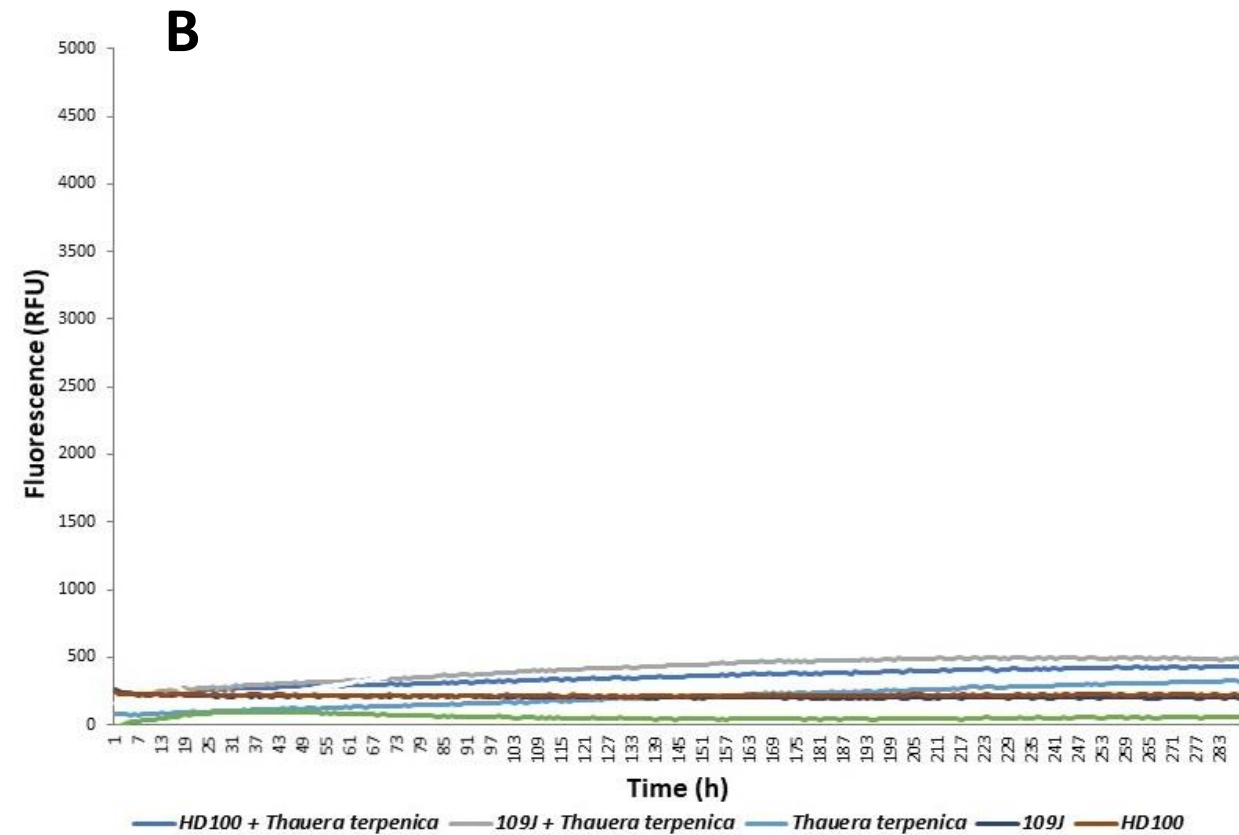

**Figure S7. BALO predation upon WWTP isolates.** Fluorescence-based tracking of the growth of Td-tomato protein-expressing *B. bacteriovorus* strains HD100 and 109J populations in the presence of prey strains (A) and non-prey strains (B), originating from WWTPs. *E. coli* ML35 is a reference prey control. Prey initial population density was circa  $10^8$  colony forming unit.  $\text{ml}^{-1}$  and predator initial population density circa  $10^6$  plaque forming units.  $\text{ml}^{-1}$ .

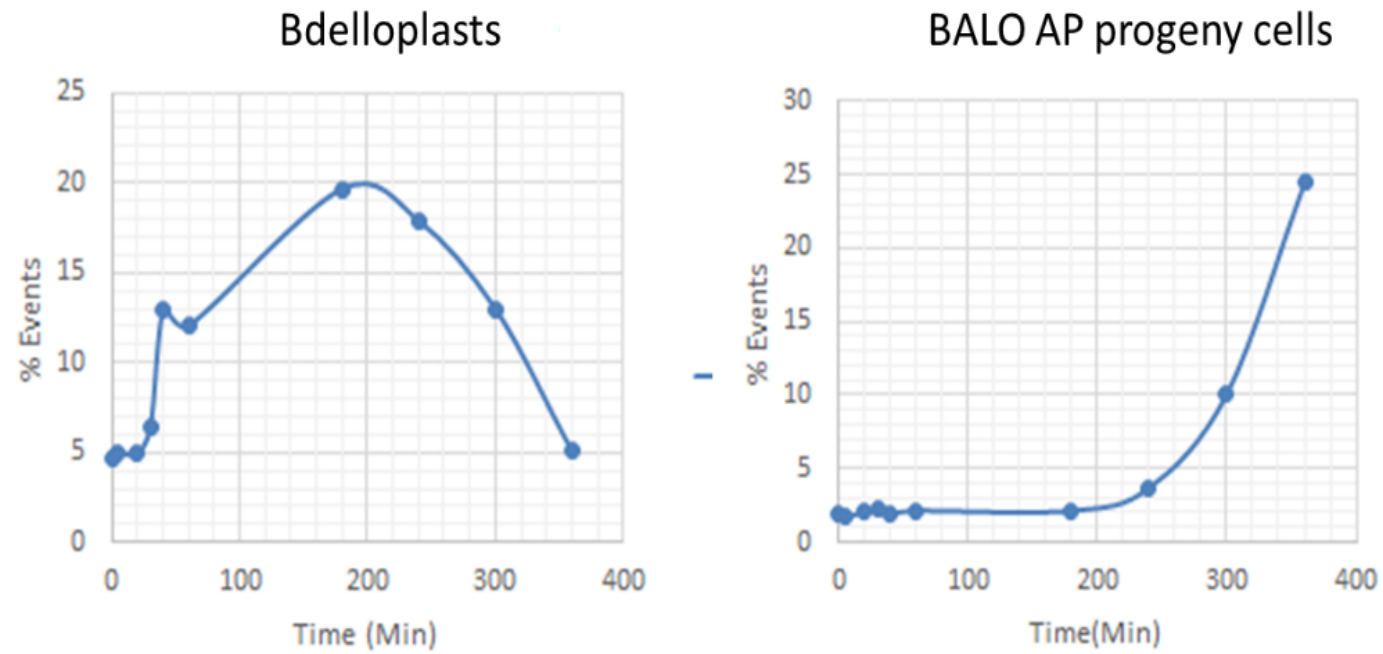

**Figure S8.** Flow cytometry analysis of a synchronous culture of *B. bacteriovorus* HD100 preying on *E. coli*. A. Dynamics of bdelloplast formation. B. Dynamics of progeny attack phase release.



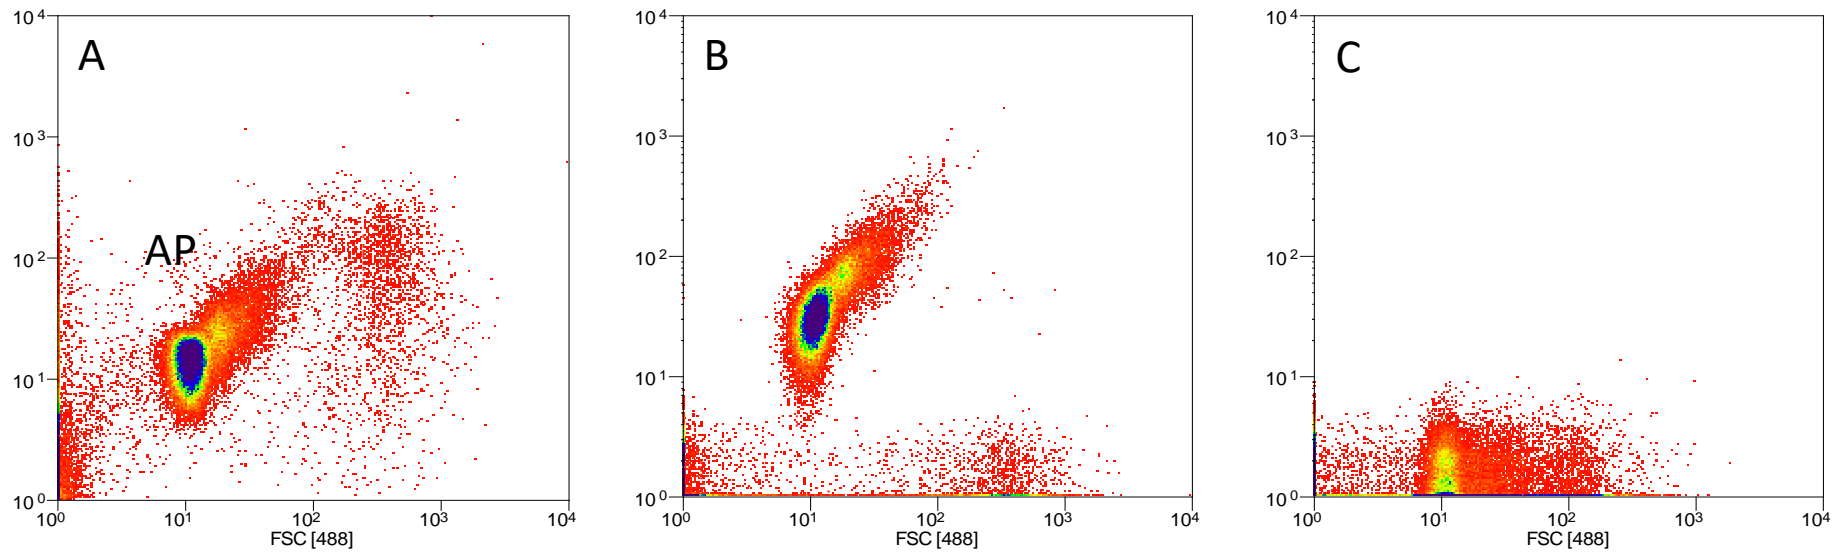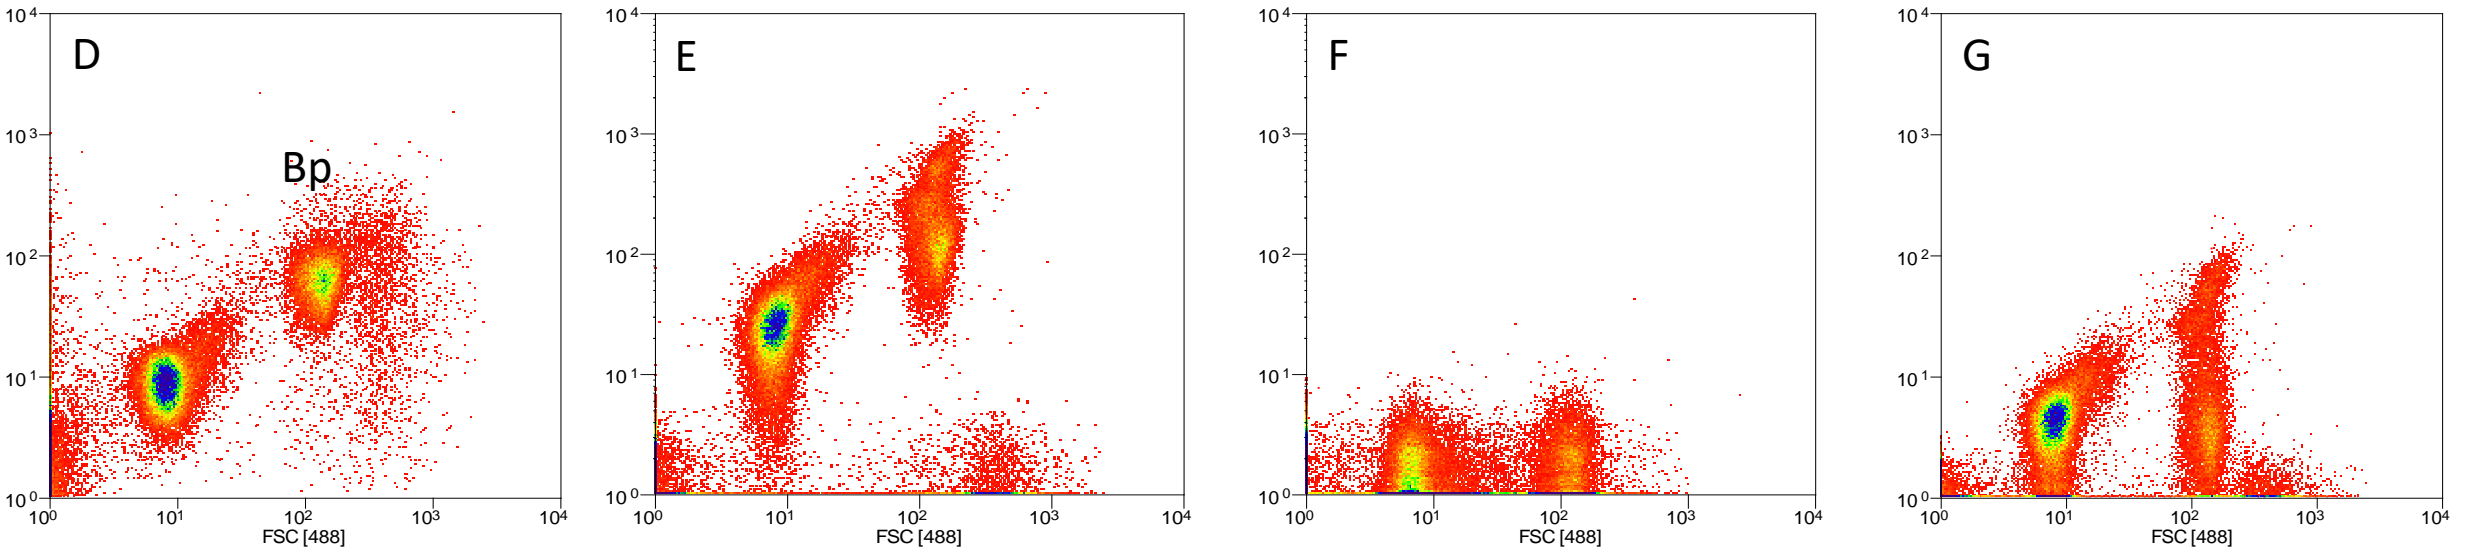

**Figure S9. Predator and prey flow cytometry (FC).** FC analysis of *B. bacteriovorus* HD100 attack phase (AP), and growth phase cells in bdelloplasts (Bp, *E. coli* prey). A. AP cells in the cell size vs. internal cell density (forward scatter (FSC)/side scatter (SSC)) detection mode; B. AP cells labelled with a BDE525-Cy5' probe in the cell size vs. Cy5 fluorescence (FSC/fluorescence (670/30[640])) detection mode; C. AP cells labelled with a NonBDE525-Cy5' probe in the cell size vs. Cy5 fluorescence (FSC/fluorescence (670/30[640])) detection mode; D. AP cells and Bp in the FSC/SSC mode; E. AP cells and Bp labelled with a BDE525-Cy5' probe in the cell size vs. Cy5 fluorescence (FSC/fluorescence (670/30[640])) detection mode; F. AP cells and Bp labelled with a NonBDE-Cy5 in the cell size vs. Cy5 fluorescence (FSC/fluorescence (670/30[640])) detection mode and; G. AP cells and Bp labelled with a general bacterial EUB338-FITC probe in the cell size vs. FITC fluorescence (FSC/fluorescence (670/30[640])) detection mode.

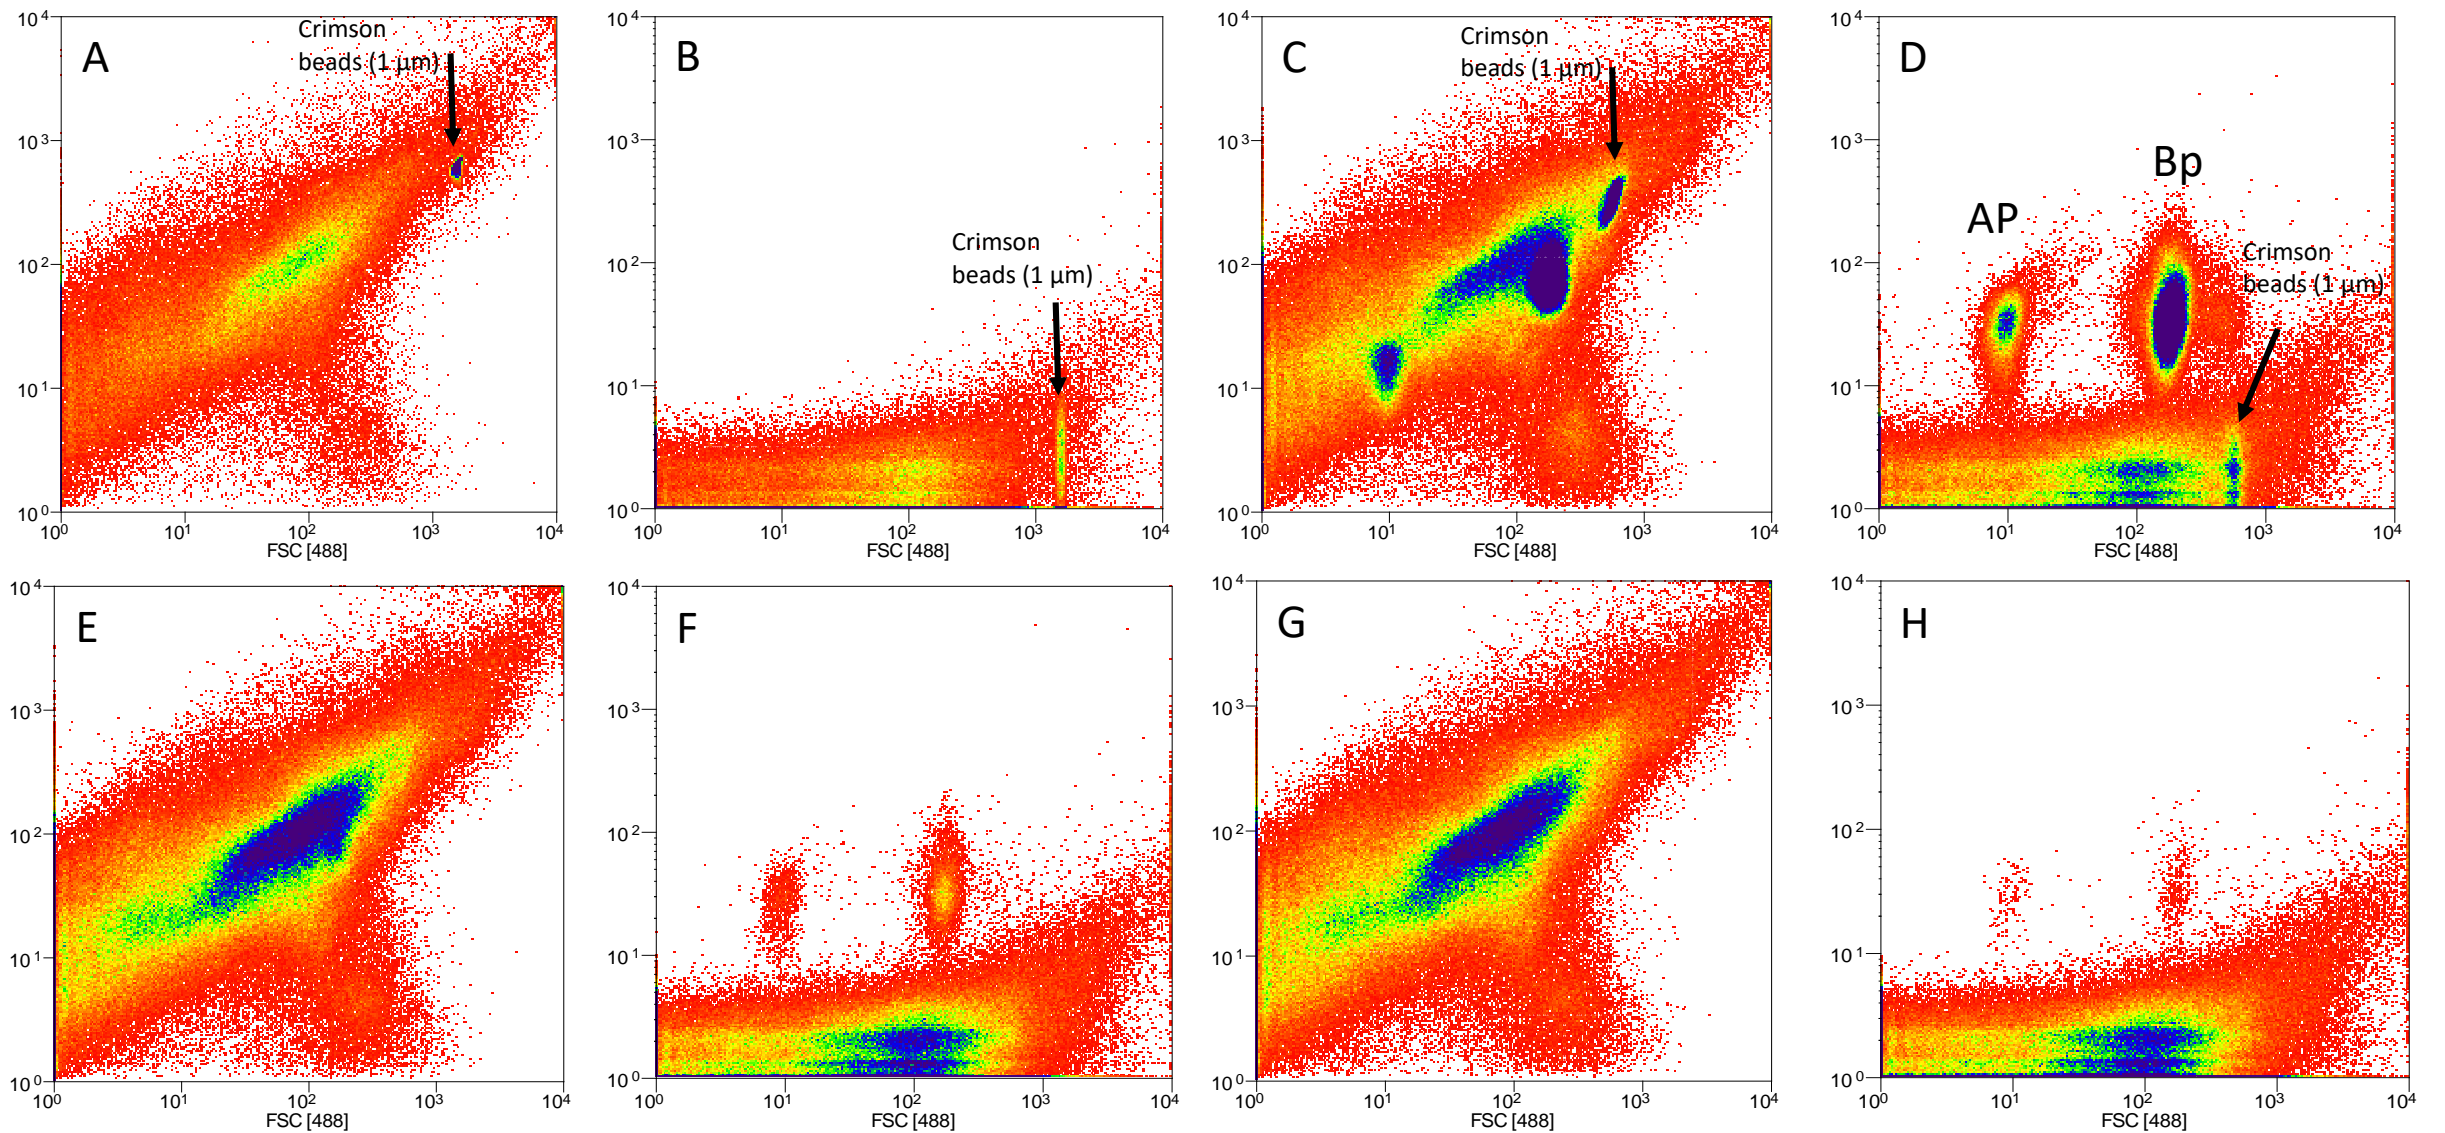

**Figure S10. Flow cytometry (FC) of activated sludge (AS) sample spiked with BALOs.** Attack (AP) cells and bdelloplasts (Bp) labelled with a BDE525-Cy5' probe, and control measurements were spiked in fixed AS samples A. Control AS sample in the forward scatter (FSC) /side scatter (SSC) detection mode; B. Control AS sample in the FSC/fluorescence (670/30[640]) (FI) detection mode; AS sample spiked with (C)  $10^8$ , (E)  $10^7$ , and (G)  $10^6$  cells per ml (10, 1, 0.1% of total cell population), respectively of mixed AP cells and bdelloplasts labelled with BDE525-Cy5' in the FSC/SSC mode. AS sample spiked with (D)  $10^8$ , (F)  $10^7$ , and (H)  $10^6$  cells per ml (10, 1, 0.1% of total cell population), respectively of AP cells and bdelloplasts labelled with BDE525-Cy5' in the FSC/FI detection mode. Crimson fluorescent beads ( $1\ \mu\text{m}$ ) were used for calibration (arrow)

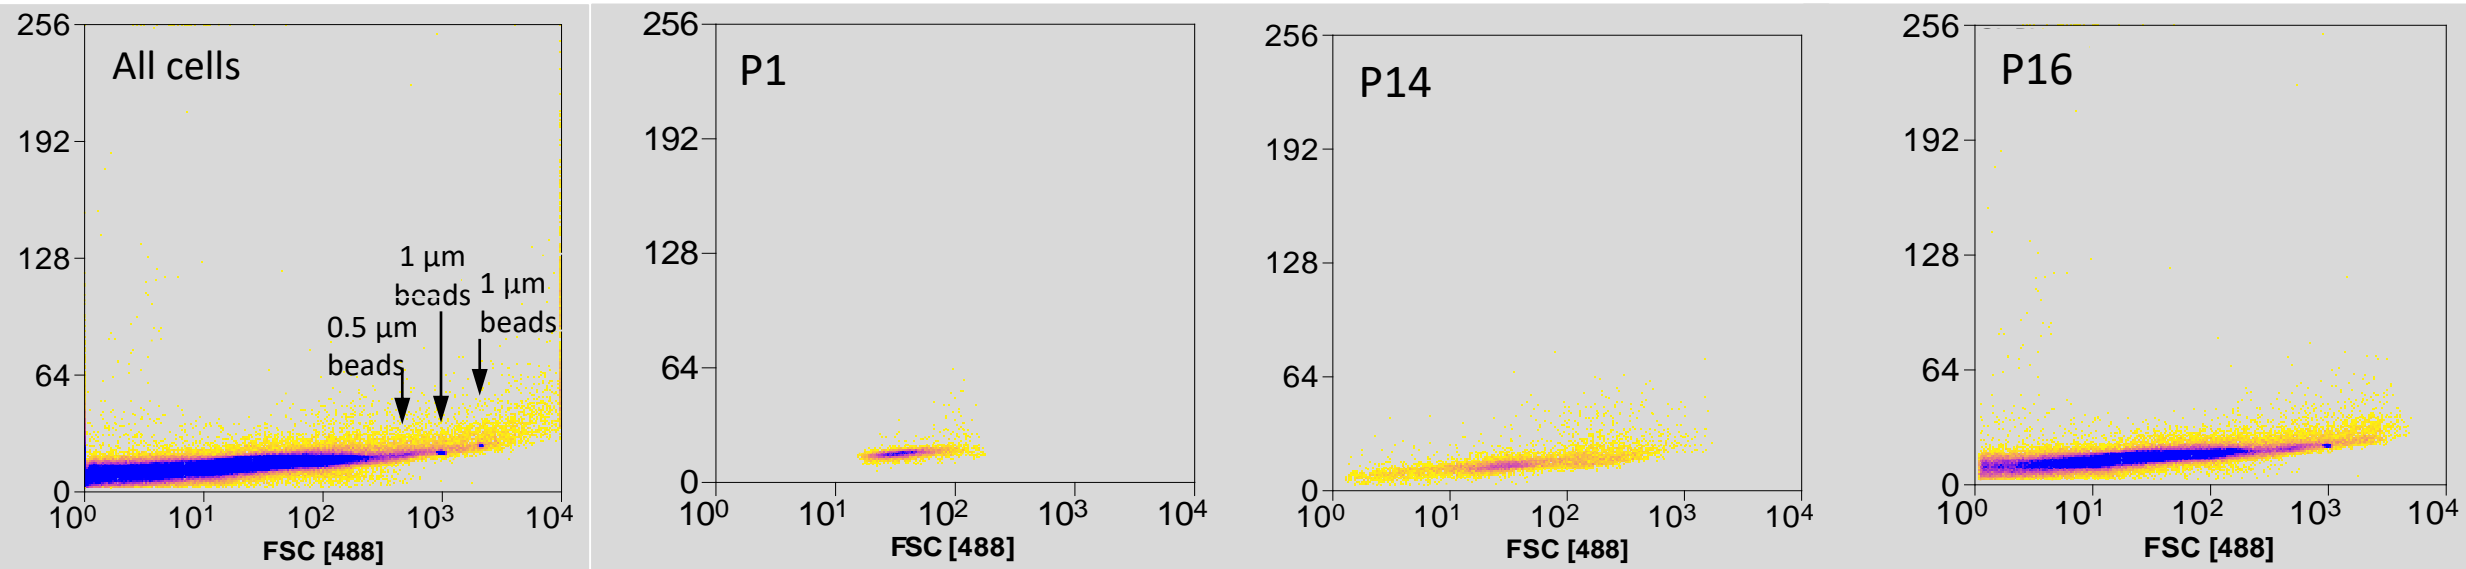

**Figure S11. Flow cytometry (FC) quality control (QC).** QC of the FC analysis by pulse width vs. forward scatter. All cells from wastewater sample, stained with DAPI and hybridized with a BDE525-Cy5' probe. P1: strongly fluorescent events (BDE525-Cy5' labelled cells); P14: weakly fluorescent events (BDE525-Cy5' labelled) cells; P16: non-fluorescent events (cells not labelled by the BDE525-Cy5' probe). The measurement validates single cell detection during the sorting process. More than 95% of the cells sorted from each gate were single cells.

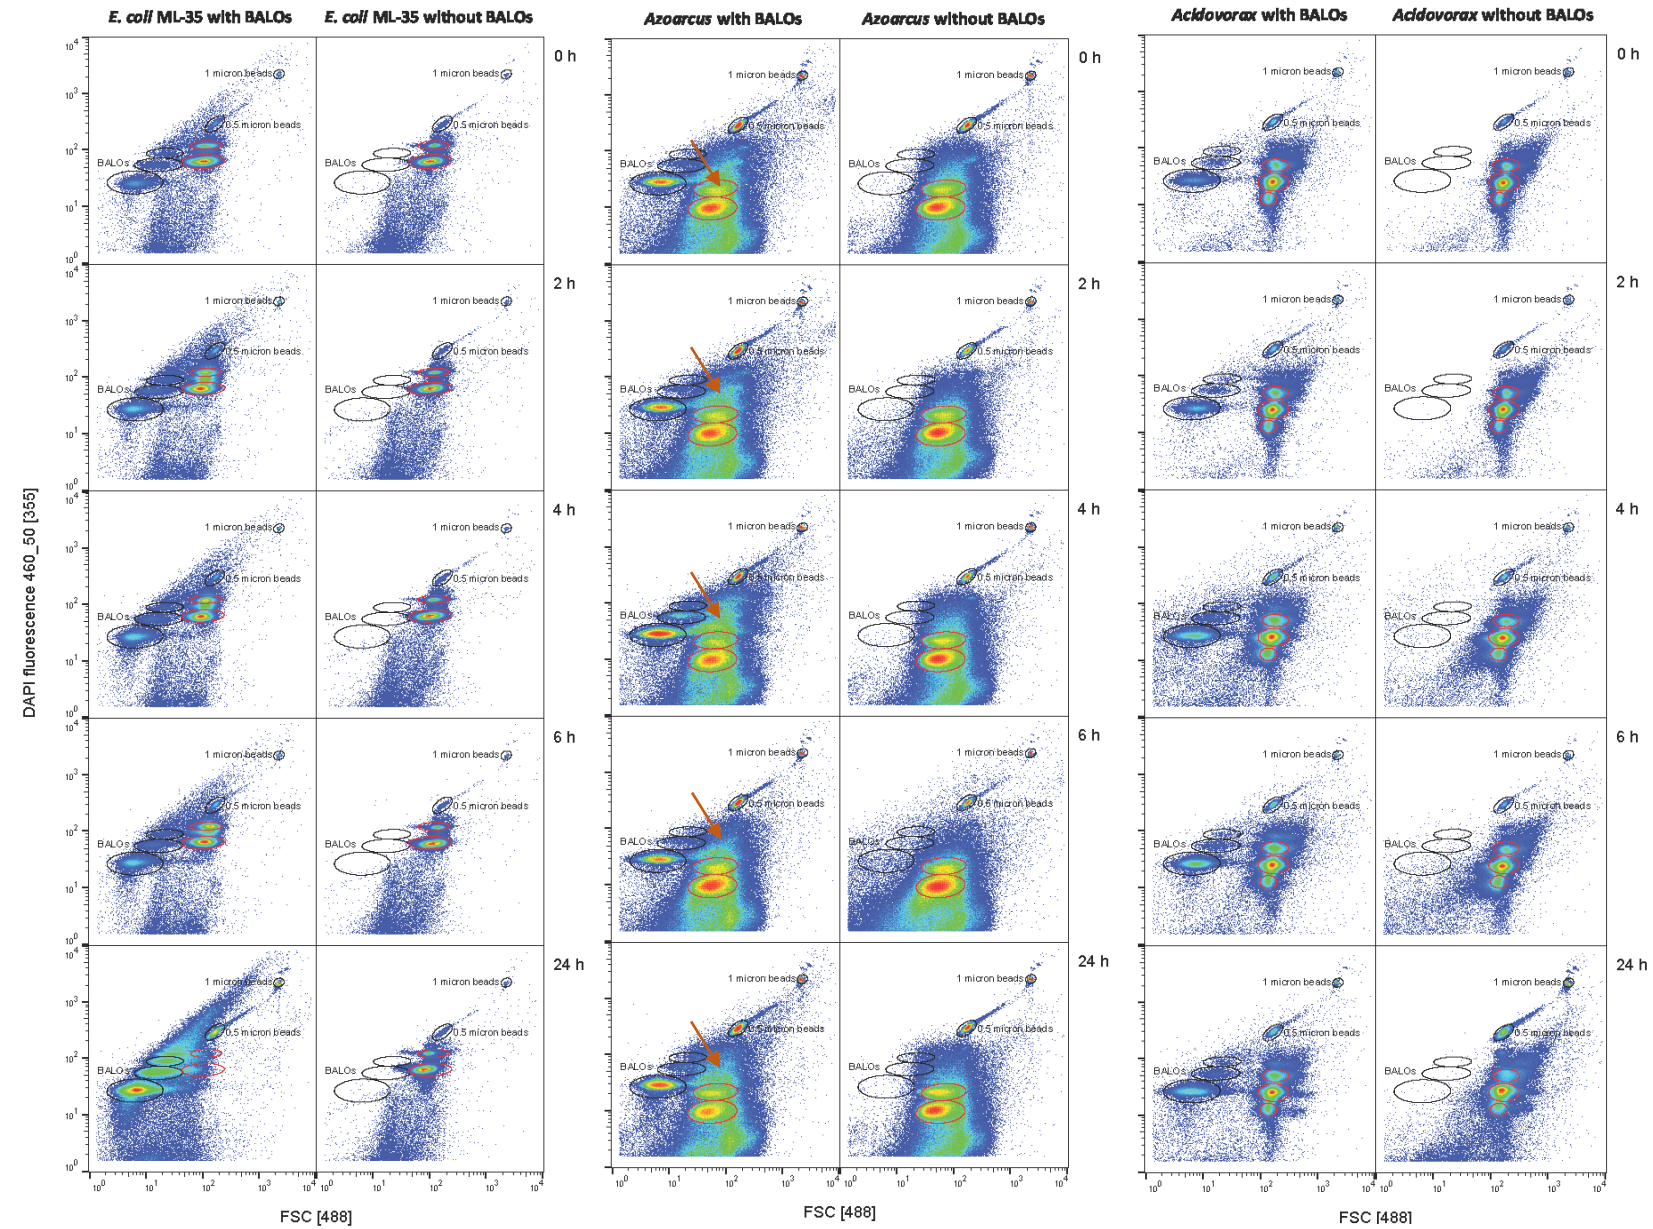

**Figure S12. Flow cytometry analysis BALO-prey and BALO-non-prey interactions.** Left: *Escherichia coli* ML-35 (prey) consumed by *B. bacteriovorus* HD100 within 24 h (empty red gates). Center: *Azoarcus* PA01 (prey) showed attachment of the predator (orange arrow), as compared to the *Azoarcus* PA01 alone. Right: *Acidovorax* M6 (non-prey) shows no variation in population patterns (unchanged red gates in the presence of the predator). Black and red gates indicate different subpopulations of the predator and of the tested strains, respectively. Upper right corner: 1  $\mu\text{m}$  and 0.5  $\mu\text{m}$  calibration beads.

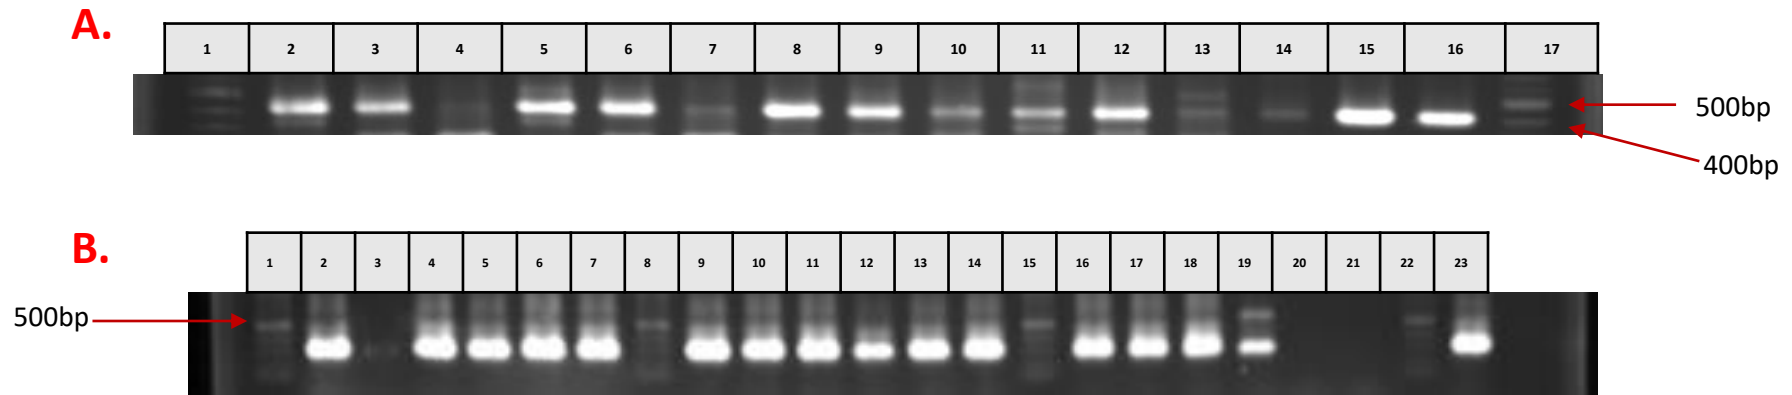

**Figure S13. PCR validations of the sorted populations.** A. PCR validation of the presence of *Bdellovibrio* spp. in gate P1 and gate P14 samples and of their absence from gate P16 samples, using *Bdellovibrio*-targeted 16S rRNA gene primers. Lanes: 1-Molecular weight marker, 2-P1, 3-P14, 4-P16, 5-P1, 6-P14, 7-P16, 8-P1, 9-P14, 10-P16, 11-P1, 12-P14, 13-P16, 14-Negative control, 15-Positive control (10<sup>6</sup> *B. bacteriovorus* cells), 16-Positive control (10<sup>5</sup> *B. bacteriovorus* cells), 17-Molecular weight marker; B. PCR amplification of DNA from gates P1, P14 and P16 samples using general bacteria-targeted 16S rRNA gene primers. Lanes: 1-Molecular weight marker, 2-P1, 3-P14 (failed reaction), 4-P16, 5-P1, 6-P14, 7-P16, 8-Molecular weight marker, 9-P1, 10-P14, 11-P16, 12-P1, 13-P14, 14-P16, 15-Molecular weight marker, 16-P1, 17-P14, 18-P16, 19-P14, 20-Negative control, 21-Negative control, 22-Molecular weight marker, 23-Positive control (*B. bacteriovorus* HD100). Each lane represents one sample.

**Table S1.**  $\alpha$ -diversity estimates (S=Richness, E=Evenness, H=Shannon index, D'=Simpson index) of Bdellovibrionales and Bacteriovoraceae communities calculated based on the grouping of 16S rDNA gene sequences as OTUs, obtained from 18 samples along a year, at the Shafdan (SH), Al-Bireh (AB), and Langenreichenbach (LB) WWTPs. F, floc fraction; L, liquor fraction. The S, E, H, and R values of Bdellovibrionales and Bacteriovoraceae in each fraction at each WWTP are significantly different (t-test,  $p < 0.01$ , two tailed). No differences were observed between fractions at each WWTP for the same family of predators, except between AB-F and AB-L.

|                           |             | <b>S</b>  | <b>E</b>  | <b>H</b> | <b>D'</b> |
|---------------------------|-------------|-----------|-----------|----------|-----------|
| <b>Bdellovibrionaceae</b> | <b>SH F</b> | 77.4±7.6  | 0.57±0.1  | 2.48±0.5 | 0.82±0.1  |
|                           | <b>SH L</b> | 72.8±12.4 | 0.59±0.08 | 2.50±0.4 | 0.84±0.09 |
|                           | <b>AB F</b> | 69.7±6.9  | 0.57±0.09 | 2.42±0.4 | 0.83±0.1  |
|                           | <b>AB L</b> | 64.4±10.3 | 0.59±0.06 | 2.45±0.3 | 0.85±0.06 |
|                           | <b>LB L</b> | 56.4±9.0  | 0.63±0.06 | 2.53±0.2 | 0.86±0.06 |
|                           | <b>LB F</b> | 56.9±7.9  | 0.62±0.06 | 2.49±0.2 | 0.86±0.06 |
| <b>Bacteriovoraceae</b>   | <b>SH F</b> | 47±9.1    | 0.35±0.1  | 1.35±0.3 | 0.58±0.1  |
|                           | <b>SH L</b> | 51.6±11.7 | 0.38±0.1  | 1.51±0.4 | 0.59±0.2  |
|                           | <b>AB F</b> | 49.1±9.7  | 0.31±0.07 | 1.21±0.3 | 0.51±0.1  |
|                           | <b>AB L</b> | 40.4±6.3  | 0.30±0.1  | 1.09±0.4 | 0.45±0.2  |
|                           | <b>LB L</b> | 49.2±16.1 | 0.35±0.1  | 1.38±0.7 | 0.55±0.1  |
|                           | <b>LB F</b> | 47.8±15.1 | 0.40±0.2  | 1.52±0.6 | 0.59±0.3  |

**Table S2.** Pearson correlations ( $|r|$ ) between the Bdellovibrionales and Bacteriovoracales predatory communities in the floc (F) and liquor (L) fractions at Shafdan (SH), Al-Bireh (AB) and Langenreichenbach (LB) WWTPs, and measured environmental parameters. Temperature (bold) ( $^{\circ}\text{C}$ ); Salinity (ppm); conductivity ( $\mu\text{S}\cdot\text{m}^{-1}$ ); Total suspended solids (TSS) ( $\text{mg}\cdot\text{l}^{-1}$ ) Volatile suspended solids (VSS) ( $\text{mg}\cdot\text{l}^{-1}$ ); Biological oxygen demand (BOD, ( $\text{mg}\cdot\text{l}^{-1}$ ); Chemical oxygen demand (COD, ( $\text{mg}\cdot\text{l}^{-1}$ ); Nitrate ( $\text{NO}_2$ ,ppm); Nitrate ( $\text{NO}_3$ ,ppm); Phosphorus ( $\text{PO}_4$ ,ppm); Total Kjeldahl nitrogen (TKN,  $\text{mg}\cdot\text{l}^{-1}$ ); Total organic carbon (TOC,  $\text{mg}\cdot\text{l}^{-1}$ ); Total dissolved solids (TDS,  $\text{mg}\cdot\text{l}^{-1}$ ). In bold – Pearson  $>0.5$ .

|                    |                            | SH F         | SH L         | AB F         | AB L         | LB F               | LB L               |
|--------------------|----------------------------|--------------|--------------|--------------|--------------|--------------------|--------------------|
| Bdellovibrionaceae | Temp[ $^{\circ}\text{C}$ ] | <b>0.789</b> | <b>0.705</b> | <b>0.46</b>  | <b>0.626</b> | <b>0.566</b>       | <b>0.507</b>       |
|                    | Salinity                   | 0.175        | 0.34         | 0.378        | 0.132        | 0.226              | 0.569              |
|                    | pH                         | 0.384        | 0.174        | 0.191        | 0.03         | 0.158              | 0.426              |
|                    | Conductivity               | 0.261        | 0.212        | 0.298        | 0.164        | 0.055              | 0.181              |
|                    | TSS(mg/l)                  | 0.055        | 0.267        | 0.134        | 0.565        | 0.622              | 0.099              |
|                    | VSS(mg/l)                  | 0.048        | 0.26         | 0.147        | 0.412        | 0.139              | 0.129              |
|                    | BOD(mg/l)                  | 0.02         | 0.268        | 0.392        | 0.197        | 0.403<br>(CBOD5Re) | 0.049<br>(CBOD5Re) |
|                    | COD(mg/l)                  | 0.006        | 0.039        | 0.229        | 0.272        |                    |                    |
|                    | NO <sub>2</sub>            | 0.249        | 0.157        | 0.262        | 0.586        | 0.297              | 0.538              |
|                    | NO <sub>3</sub> (ppm)      | 0.28         | 0.353        | 0.377        | 0.386        | 0.281              | 0.295              |
|                    | NH <sub>4</sub> (ppm)      | 0.248        | 0.345        | 0.068        | 0.24         | 0.146              | 0.273              |
|                    | PO <sub>4</sub> (ppm)      | 0.037        | 0.378        | 0.482        | 0.065        | 0.098              | 0.473              |
|                    | TKN                        | 0.456        | 0.647        | 0.08         | 0.151        | 0.188              | 0.608              |
|                    | TOC                        | 0.347        | 0.339        | 0.135        | 0.276        | 0.091              | 0.085              |
| TDS(mg/l)          | 0.372                      | 0.171        | 0.216        | 0.404        | N/A          | N/A                |                    |
| Bacteriovoraceae   | Temp[ $^{\circ}\text{C}$ ] | <b>0.95</b>  | <b>0.919</b> | <b>0.221</b> | <b>0.536</b> | <b>0.785</b>       | <b>0.804</b>       |
|                    | Salinity                   | 0.119        | 0.065        | 0.376        | 0.021        | 0.32               | 0.61               |
|                    | pH                         | 0.411        | 0.403        | 0.003        | 0.362        | 0.102              | 0.756              |
|                    | Conductivity               | 0.604        | 0.694        | 0.368        | 0.016        | 0.239              | 0.055              |
|                    | TSS(g/l)                   | 0.208        | 0.179        | 0.011        | 0.567        | 0.605              | 0.006              |
|                    | VSS(g/l)                   | 0.214        | 0.284        | 0.46         | 0.236        | 0.012              | 0.249              |
|                    | BOD(mg/l)                  | 0.287        | 0.634        | 0.029        | 0.157        | 0.392              | 0.069              |
|                    | COD(mg/l)                  | 0.314        | 0.403        | 0.266        | 0.019        | (CBOD5)            | (CBOD5)            |
|                    | NO <sub>2</sub>            | 0.036        | 0.25         | 0.567        | 0.127        | 0.055              | 0.468              |
|                    | NO <sub>3</sub> (ppm)      | 0.005        | 0.519        | 0.599        | 0.881        | 0.504              | 0.429              |
|                    | NH <sub>4</sub> (ppm)      | 0.015        | 0.009        | 0.279        | 0.541        | 0.205              | 0.461              |
|                    | PO <sub>4</sub> (ppm)      | 0.335        | 0.438        | 0.653        | 0.052        | 0.046              | 0.092              |
|                    | TKN                        | 0.228        | 0.67         | 0.429        | 0.305        | 0.327              | 0.652              |
|                    | TOC                        | 0.096        | 0.29         | 0.638        | 0.759        | 0.122              | 0.216              |
| TDS(mg/l)          | 0.009                      | 0.051        | 0.164        | 0.299        | N/A          | N/A                |                    |

**Table S3.** Parameters describing the bacterial predator-prey networks derived from negative ( $-0.7 >$ ) and significant ( $p < 0.05$ ) Kendall correlations. Edges are the number of predator-prey interactions in each sludge fraction (floc/liquor). Edges/Connections (%) indicates the percentage of positive edges out of the total possible number of connections. Nodes are the number of predators and prey found to have positive associations according to the criteria above. Average degree/node connectivity is the average number of edges that are incident on a node. Modularity Index values  $> 0.4$  suggest the network has a modular structure (hence more robust). Averaged edges of Bdellovibrionales (Bd), and of Bacteriovoracales (Bx) are the average number of connections with prey for each of the two families. Shared predators/prey indicate the ratio (in %) of OTUs which appear both in the floc and in the liquor at each WWTP.

|                                               | SH F               | SH L               | AB F               | AB L                | LB F               | LB L               |
|-----------------------------------------------|--------------------|--------------------|--------------------|---------------------|--------------------|--------------------|
| <b>Bacterial OTUs</b>                         | 3374               | 3468               | 3528               | 3601                | 3778               | 3833               |
| <b>Bd OTUs</b>                                | 111                | 114                | 112                | 110                 | 102                | 99                 |
| <b>Bx OTUs</b>                                | 219                | 240                | 205                | 181                 | 235                | 250                |
| <b>Total no. of connections</b>               | 1106672            | 1133650            | 1112636            | 1042944             | 1257648            | 1228539            |
| <b>Edges (<math>\leq -0.7</math>)</b>         | 292                | 113                | 516                | 830                 | 399                | 537                |
| <b>Edges/ Connections (%)</b>                 | 0.026              | 0.010              | 0.046              | 0.080               | 0.032              | 0.044              |
| <b>Nodes (Predator)<br/>(Bd/Bx)</b>           | 70<br>(44/26)      | 49<br>(32/17)      | 67<br>(41/26)      | 77<br>(51/26)       | 65<br>(36/29)      | 83<br>(41/42)      |
| <b>Nodes (Prey)</b>                           | 152                | 70                 | 243                | 336                 | 232                | 299                |
| <b>Average degree/ node connectivity</b>      | 2.69               | 1.65               | 3.03               | 3.82                | 2.61               | 2.71               |
| <b>Network Diameter</b>                       | 13                 | 12                 | 10                 | 10                  | 12                 | 14                 |
| <b>Averaged Path Length</b>                   | 4.28               | 4.49               | 3.93               | 3.83                | 4.62               | 4.50               |
| <b>Modularity Index</b>                       | 0.73               | 0.86               | 0.67               | 0.54                | 0.77               | 0.74               |
| <b>Avg. Edges for Bd (<math>\pm</math>SE)</b> | 4.52 $\pm$ 0.76    | 2.41<br>$\pm$ 0.32 | 9.24<br>$\pm$ 1.80 | 8.61<br>$\pm$ 2.07  | 6.67<br>$\pm$ 0.89 | 6.71<br>$\pm$ 1.52 |
| <b>Avg. Edges for Bx (<math>\pm</math>SE)</b> | 3.57<br>$\pm$ 0.61 | 2.18<br>$\pm$ 0.41 | 5.26<br>$\pm$ 1.21 | 15.04<br>$\pm$ 3.05 | 5.48<br>$\pm$ 1.02 | 6.24<br>$\pm$ 1.08 |
| <b>Shared Predators (%)</b>                   | 48.8               |                    | 41.2               |                     | 43.7               |                    |
| <b>Shared Prey (%)</b>                        | 13.5               |                    | 12.1               |                     | 14.7               |                    |



**Table S4.** Characteristics of the wastewater treatment plants (WWTP) sampled in this study. A. Location and size of the plants. B. Average values ( $\pm$  SD) of chemical parameters measured in the floc (F) and liquor (L) fractions at Shafdan (SH), Al-Bireh (AB) and Langenreichenbach (LB). Temperature ( $^{\circ}$ C); Salinity (ppm); conductivity ( $\mu$ S/m); Total suspended solids(TSS)( $\text{mg.l}^{-1}$ ) Volatile suspended solids (VSS) ( $\text{mg.l}^{-1}$ ); Biological oxygen demand (BOD, ( $\text{mg.l}^{-1}$ ); Chemical oxygen demand (COD, ( $\text{mg.l}^{-1}$ ); Nitrate ( $\text{NO}_2$ ,ppm); Nitrate ( $\text{NO}_3$ ,ppm); Phosphorus ( $\text{PO}_4$ ,ppm); Total Kjeldahl nitrogen (TKN,  $\text{mg.l}^{-1}$ ); Total organic carbon (TOC,  $\text{mg.l}^{-1}$ ); Total dissolved solids (TDS,  $\text{mg.l}^{-1}$ ).

| WWTP |                            | Details                                                                                                                        |                    |                  |                       |                         |                        |                                     |                       |                   |                    |                   |                    |                   |                       |                      |
|------|----------------------------|--------------------------------------------------------------------------------------------------------------------------------|--------------------|------------------|-----------------------|-------------------------|------------------------|-------------------------------------|-----------------------|-------------------|--------------------|-------------------|--------------------|-------------------|-----------------------|----------------------|
| A.   | Shafdan, Israel            | A central WWTP serving a population of two millions in the Dan region. Treats 130 million cubic meters of wastewater annually. |                    |                  |                       |                         |                        |                                     |                       |                   |                    |                   |                    |                   |                       |                      |
|      | Al-Bireh, Palestine        | A communal WWTP. Treats wastewater for a population of 45000-50000, including industrial wastewater.                           |                    |                  |                       |                         |                        |                                     |                       |                   |                    |                   |                    |                   |                       |                      |
|      | Langenreichenbach, Germany | A communal WWTP (no industrial wastewater). Located 50km northeast to Leipzig, Treats wastewater from 4000 homes.              |                    |                  |                       |                         |                        |                                     |                       |                   |                    |                   |                    |                   |                       |                      |
| B.   |                            | Temp [ $^{\circ}$ C]                                                                                                           | Salinity           | pH               | Conductivity          | TSS                     | VSS                    | COD                                 | BOD                   | $\text{NO}_2$     | $\text{NO}_3$      | $\text{NH}_4$     | $\text{PO}_4$      | TKN               | TOC                   | TDS                  |
|      | Sh F                       | 25.3<br>$\pm 3.9$                                                                                                              | 0.63<br>$\pm 0.1$  | 7.6<br>$\pm 0.4$ | 1281.3<br>$\pm 185.5$ | 2459.9<br>$\pm 1005.4$  | 2223.6<br>$\pm 937.9$  | 4099.2<br>$\pm 15.1$                | 2365.7<br>$\pm 15.4$  | 2.63<br>$\pm 2.4$ | 5.7<br>$\pm 3.3$   | 4.9<br>$\pm 2.6$  | 26.7<br>$\pm 16.1$ | 10.1<br>$\pm 4.1$ | 19.8<br>$\pm 15.7$    | 786.2<br>$\pm 104.1$ |
|      | Sh L                       | 25.4<br>$\pm 3.9$                                                                                                              | 0.64<br>$\pm 0.06$ | 7.6<br>$\pm 2.9$ | 1303.8<br>$\pm 141.6$ | 11.7<br>$\pm 15.3$      | 8.1<br>$\pm 1.2$       | 30.2<br>$\pm 9.2$                   | 12.5<br>$\pm 3.9$     | 3.3<br>$\pm 2.3$  | 8.6<br>$\pm 3.8$   | 3.6<br>$\pm 2.4$  | 11.3<br>$\pm 6.2$  | 5.4<br>$\pm 4.3$  | 19.3<br>$\pm 16.8$    | 816.5<br>$\pm 110.9$ |
|      | AB F                       | 21.2<br>$\pm 7.4$                                                                                                              | 0.56<br>$\pm 0.1$  | 7.0<br>$\pm 0.2$ | 1455.1<br>$\pm 213.6$ | 3285.33<br>$\pm 1197.9$ | 4362.9<br>$\pm 1971.5$ | 4774.2<br>$\pm 1575.2$              | 1110.7<br>$\pm 436.6$ | 0.26<br>$\pm 0.2$ | 44.9<br>$\pm 37.9$ | 6.6<br>$\pm 7.0$  | 18.0<br>$\pm 20.9$ | N/A               | 14.2<br>$\pm 10.0$    | 895.1<br>$\pm 145.4$ |
|      | ABL                        | 21.9<br>$\pm 7.1$                                                                                                              | 0.57<br>$\pm 0.2$  | 7.4<br>$\pm 0.3$ | 1413.3<br>$\pm 191.7$ | 25.7<br>$\pm 34.057$    | 3984.2<br>$\pm 1601.8$ | 119.9<br>$\pm 54.1$                 | 43.52<br>$\pm 24.3$   | 0.19<br>$\pm 0.1$ | 59.3<br>$\pm 53.6$ | 4.1<br>$\pm 4.6$  | 2.8<br>$\pm 2.8$   | N/A               | 12.5<br>$\pm 7.6$     | 855.2<br>$\pm 132.4$ |
|      | LB F                       | 14.8<br>$\pm 5.0$                                                                                                              | 0.66<br>$\pm 0.1$  | 6.8<br>$\pm 0.0$ | 984.7<br>$\pm 282.6$  | 4338.9<br>$\pm 981.6$   | 1353.7<br>$\pm 250.9$  | 2210.8<br>$\pm 847.3$<br>(CBOD5 Re) |                       | 0.16<br>$\pm 0.1$ | 16.4<br>$\pm 7.7$  | 3.3<br>$\pm 10.1$ | 1.0<br>$\pm 0.2$   | 9.4<br>$\pm 1.2$  | 3752.0<br>$\pm 796.1$ | N/A                  |
|      | LBL                        | 14.3<br>$\pm 5.6$                                                                                                              | 0.71<br>$\pm 0.2$  | 6.9<br>$\pm 1.6$ | 1043.1<br>$\pm 290.3$ | 2.0<br>$\pm 1.7$        | 0.61<br>$\pm 0.5$      | 709.7<br>$\pm 1097.1$<br>(CBOD5 Re) |                       | 0.07<br>$\pm 0.1$ | 18.0<br>$\pm 6.3$  | 0.9<br>$\pm 1.8$  | 1.1<br>$\pm 0.2$   | 7.1<br>$\pm 4.0$  | 16.8<br>$\pm 14.3$    | N/A                  |

**Table S5. Probes and primers used in this study.**

| Name      | Sequence (5'-3')         | Position  | %GC  | Tm        | Labels | Reference             |  |  |  |  |                                            |
|-----------|--------------------------|-----------|------|-----------|--------|-----------------------|--|--|--|--|--------------------------------------------|
| BbsF216   | TTTCGCTCTAAGATGAGTCCGCGT | 216-239   | 50   | 57.4      |        | Essche et al. 2009    |  |  |  |  | 16S qPCR Bdellovibrionaceae primers        |
| BbsR707   | TTTCGCTCCGGTATTCTGTTGAT  | 683-707   | 50   | 57.4      |        | Essche et al. 2009    |  |  |  |  | 16S qPCR Bdellovibrionaceae primers        |
| Bd347F    | GGAGGCAGCAGTAGGGAATA     | 347-366   | 55   | 56.2      |        | Essche et al. 2009    |  |  |  |  | 16S qPCR Bdellovibrionaceae primers        |
| Bd549R    | GCTAGGATCCCTCGTCTTACC    | 529-549   | 57.1 | 56.4      |        | Essche et al. 2009    |  |  |  |  | 16S qPCR Bdellovibrionaceae primers        |
| BacF69    | TGGCGCACGGGCTGAGTAAC     | 69-88     | 65   | 57.9      |        | This study            |  |  |  |  | 16S qPCR Bacteriovoraceae primers          |
| BacR1049  | AGCCATGCAGCGCCTGTACAC    | 1030-1049 | 65   | 57.9      |        | This study            |  |  |  |  | 16S qPCR Bacteriovoraceae primers          |
| BacF519   | CAGCAGCCGCGGTAATAC       | 519-536   | 61   | 57.47     |        | Zheng et al. 2008     |  |  |  |  | 16S Bacteriovoraceae qPCR primers          |
| BacR677   | CGGATTTTACCCCTACATGC     | 658-677   | 50   | 57.35     |        | Zheng et al. 2008     |  |  |  |  | 16S Bacteriovoraceae qPCR primers          |
| BDE525*   | GATCCCTCGTCTTACCGC       | 525-542   | 61   | 58.4      | 5' Cy3 | Mahmoud et al. 2007   |  |  |  |  | 16S Bdellovibrionaceae FISH probe          |
| Univ16S-1 | GTGTCGAYGGYGTGTCGTCA     | 1048-1067 | 50   | 53.8-57.9 |        | Nakatsuji et al. 2013 |  |  |  |  | 16S Bacteria Universal qPCR primers        |
| Univ16S-1 | ACGTCRTCCMCACCTTCTC      | 1156-1175 | 55   | 53.8-57.9 |        | Nakatsuji et al. 2013 |  |  |  |  | 16S Bacteria Universal qPCR primers        |
| Bd824F    | ACTTGTTGTTGGAGGTAT       | 824-841   | 39   | 43.5      |        | Pasternak et al. 2013 |  |  |  |  | 16S rRNA gene primers of Bdellovibrionales |
| Bd1222R   | TTGTAGCACGTGTGTAG        | 1206-1222 | 47   | 44.6      |        | Pasternak et al. 2013 |  |  |  |  | 16S rRNA gene primers of Bdellovibrionales |
| Bx341F    | CTACGGGAGGCAGCAG         | 341-355   | 69   | 51.1      |        | Pasternak et al. 2013 |  |  |  |  | 16S rRNA gene primers of Bdellovibrionales |
| Bx672R    | TACCCCTACATGCGAAATTCC    | 652-672   | 48   | 52.4      |        | Pasternak et al. 2013 |  |  |  |  | 16S rRNA gene primers of Bdellovibrionales |
| 515F      | GTGCCAGCMGCCGCGGTAA      | 515-533   | 68   | 57.6-59.7 |        | Walters et al. 2016   |  |  |  |  | 16S rRNA gene primers of Total Bacteria    |
| 926R      | CCGYCAATTYMTTTRAGTTT     | 906-926   | 25   | 41.5-49.7 |        | Walters et al. 2016   |  |  |  |  | 16S rRNA gene primers of Total Bacteria    |

### Supplementary References

Mahmoud, K. K., McNeely, D., Elwood, C., & Koval, S.F. Design and performance of a 16S rRNA-targeted oligonucleotide probe for detection of members of the genus *Bdellovibrio* by fluorescence in situ hybridization. *Appl. Environ. Microbiol.* **73**, 7488-7493, doi:10.1128/aem.01112-07 (2007)

Nakatsuji, T. *et al.* The microbiome extends to subepidermal compartments of normal skin. *Nat. Commun.* **4**, 1431, doi:10.1038/ncomms2441 (2013)

Van Essche, M. *et al.* Development and performance of a quantitative PCR for the enumeration of Bdellovibrionaceae. *Environ. Microbiol. Rep.* **1**, 228-233, doi:10.1111/j.1758-2229.2009.00034.x (2009).

Walters, W. *et al.* Improved bacterial 16S rRNA gene (V4 and V4-5) and fungal internal transcribed spacer marker gene primers for microbial community surveys. *Msyst.* **1**;1(1):e00009-15 (2016)

Zheng, G., Wang, C., Williams, HN, & Pineiro, SA. Development and evaluation of a quantitative real-time PCR assay for the detection of saltwater *Bacteriovorax*. *Environ. Microbiol.* **10**, 2515-2526 (2008).
